# Supplementary material for: Systematic review and meta-analysis of the spatio-temporal changes in apparent tsetse fly density in Uganda from 1980 to 2022
Source: Research Square preprint supplement (doi:10.21203/rs.3.rs-7491610/v1), 2025-09-25
Supplement: Supplementary file 1 [file 5c449027b3afb8241b766cb1.docx]

**Systematic review and meta-analysis of the spatio-temporal changes in apparent tsetse fly density in Uganda from 1980 to 2022**

Karla Rascón-García, Auther Tamale Wasswa, Beatriz Martínez-López,Giuliano Cecchi, Albert Mugenyi, Enock Matovu, Dennis Muhanguzi*

***Correspondence:** [dennis.muhanguzi@mak.ac.ug](mailto:dennis.muhanguzi@mak.ac.ug)

# Contents

## [PRISMA Checklist](#PRISMA)

## [Prisma 2020 for Abstracts Checklist](#PRISMA_Abstracts)

## [Supplementary Tables](#Tables)

## [Supplementary Figures](#Figures)

# PRISMA 2020 Checklist

| **Section and Topic** | **Item #** | **Checklist item** | **Location where item is reported** |
| --- | --- | --- | --- |
| **TITLE** | | |  |
| Title | 1 | Identify the report as a systematic review. | Page 01 |
| **ABSTRACT** | | |  |
| Abstract | 2 | See the PRISMA 2020 for Abstracts checklist. | Supplementary Information, Page iii |
| **INTRODUCTION** | | |  |
| Rationale | 3 | Describe the rationale for the review in the context of existing knowledge. | Page 02-03 |
| Objectives | 4 | Provide an explicit statement of the objective(s) or question(s) the review addresses. | Page 03 |
| **METHODS** | | |  |
| Eligibility criteria | 5 | Specify the inclusion and exclusion criteria for the review and how studies were grouped for the syntheses. | Page 05 |
| Information sources | 6 | Specify all databases, registers, websites, organisations, reference lists and other sources searched or consulted to identify studies. Specify the date when each source was last searched or consulted. | Page 03 |
| Search strategy | 7 | Present the full search strategies for all databases, registers, and websites, including any filters and limits used. | Page 03-04 |
| Selection process | 8 | Specify the methods used to decide whether a study met the inclusion criteria of the review, including how many reviewers screened each record and each report retrieved, whether they worked independently, and if applicable, details of automation tools used in the process. | Page 04 |
| Data collection process | 9 | Specify the methods used to collect data from reports, including how many reviewers collected data from each report, whether they worked independently, any processes for obtaining or confirming data from study investigators, and if applicable, details of automation tools used in the process. | Page 04 |
| Data items | 10a | List and define all outcomes for which data were sought. Specify whether all results that were compatible with each outcome domain in each study were sought (e.g., for all measures, time points, analyses), and if not, the methods used to decide which results to collect. | Page 05 |
| 10b | List and define all other variables for which data were sought (e.g., participant and intervention characteristics, funding sources). Describe any assumptions made about any missing or unclear information. | Page 05 |
| Study risk of bias assessment | 11 | Specify the methods used to assess risk of bias in the included studies, including details of the tool(s) used, how many reviewers assessed each study and whether they worked independently, and if applicable, details of automation tools used in the process. | Page 06 |
| Effect measures | 12 | Specify for each outcome the effect measure(s) (e.g., risk ratio, mean difference) used in the synthesis or presentation of results. | Page 06 |
| Synthesis methods | 13a | Describe the processes used to decide which studies were eligible for each synthesis (e.g., tabulating the study intervention characteristics and comparing against the planned groups for each synthesis (item #5)). | Page 06 |
| 13b | Describe any methods required to prepare the data for presentation or synthesis, such as handling of missing summary statistics, or data conversions. | Page 06 |
| 13c | Describe any methods used to tabulate or visually display results of individual studies and syntheses. | Page 06-07 |
| 13d | Describe any methods used to synthesize results and provide a rationale for the choice(s). If meta-analysis was performed, describe the model(s), method(s) to identify the presence and extent of statistical heterogeneity, and software package(s) used. | Page 06-07 |
| 13e | Describe any methods used to explore possible causes of heterogeneity among study results (e.g., subgroup analysis, meta-regression). | Page 07 |
| 13f | Describe any sensitivity analyses conducted to assess robustness of the synthesized results. | Page 11 |
| Reporting bias assessment | 14 | Describe any methods used to assess risk of bias due to missing results in a synthesis (arising from reporting biases). | Page 11 |
| Certainty assessment | 15 | Describe any methods used to assess certainty (or confidence) in the body of evidence for an outcome. | n/a |
| **RESULTS** | | |  |
| Study selection | 16a | Describe the results of the search and selection process, from the number of records identified in the search to the number of studies included in the review, ideally using a flow diagram. | Page 08 |
| 16b | Cite studies that might appear to meet the inclusion criteria, but which were excluded, and explain why they were excluded. | Page 04 |
| Study characteristics | 17 | Cite each included study and present its characteristics. | Supplementary Information, Table S1 |
| Risk of bias in studies | 18 | Present assessments of risk of bias for each included study. | Supplementary Information, Figure S2 |
| Results of individual studies | 19 | For all outcomes, present, for each study: (a) summary statistics for each group (where appropriate) and (b) an effect estimate and its precision (e.g., confidence/credible interval), ideally using structured tables or plots. | Page 11 |
| Results of syntheses | 20a | For each synthesis, briefly summarise the characteristics and risk of bias among contributing studies. | Page 11 |
| 20b | Present results of all statistical syntheses conducted. If meta-analysis was done, present for each the summary estimate and its precision (e.g., confidence/credible interval) and measures of statistical heterogeneity. If comparing groups, describe the direction of the effect. | Page 11-14 |
| 20c | Present results of all investigations of possible causes of heterogeneity among study results. | Page 13 |
| 20d | Present results of all sensitivity analyses conducted to assess the robustness of the synthesized results. | Supplementary Information, Figure S3-S4 |
| Reporting biases | 21 | Present assessments of risk of bias due to missing results (arising from reporting biases) for each synthesis assessed. | n/a |
| Certainty of evidence | 22 | Present assessments of certainty (or confidence) in the body of evidence for each outcome assessed. | n/a |
| **DISCUSSION** | | |  |
| Discussion | 23a | Provide a general interpretation of the results in the context of other evidence. | Page 15-16 |
| 23b | Discuss any limitations of the evidence included in the review. | Page 16-17 |
| 23c | Discuss any limitations of the review processes used. | Page 16-17 |
| 23d | Discuss implications of the results for practice, policy, and future research. | Page 16-17 |
| **OTHER INFORMATION** | | |  |
| Registration and protocol | 24a | Provide registration information for the review, including register name and registration number, or state that the review was not registered. | Page 23 |
| 24b | Indicate where the review protocol can be accessed, or state that a protocol was not prepared. | Page 23 |
| 24c | Describe and explain any amendments to information provided at registration or in the protocol. | n/a |
| Support | 25 | Describe sources of financial or non-financial support for the review, and the role of the funders or sponsors in the review. | Page 23 |
| Competing interests | 26 | Declare any competing interests of review authors. | Page 24 |
| Availability of data, code and other materials | 27 | Report which of the following are publicly available and where they can be found template data collection forms; data extracted from included studies; data used for all analyses; analytic code; any other materials used in the review. | Page 24 |

# PRISMA 2020 for Abstracts Checklist

| **Section and Topic** | **Item #** | **Checklist item** | **Reported (Yes/No)** |
| --- | --- | --- | --- |
| **TITLE** | | |  |
| Title | 1 | Identify the report as a systematic review. | **Yes** |
| **BACKGROUND** | | |  |
| Objectives | 2 | Provide an explicit statement of the main objective(s) or question(s) the review addresses. | **Yes** |
| **METHODS** | | |  |
| Eligibility criteria | 3 | Specify the inclusion and exclusion criteria for the review. | **Yes** |
| Information sources | 4 | Specify the information sources (e.g. databases, registers) used to identify studies and the date when each was last searched. | **Yes** |
| Risk of bias | 5 | Specify the methods used to assess risk of bias in the included studies. | **Yes** |
| Synthesis of results | 6 | Specify the methods used to present and synthesise results. | **Yes** |
| **RESULTS** | | |  |
| Included studies | 7 | Give the total number of included studies and participants and summarise relevant characteristics of studies. | **Yes** |
| Synthesis of results | 8 | Present results for main outcomes, preferably indicating the number of included studies and participants for each. If meta-analysis was done, report the summary estimate and confidence/credible interval. If comparing groups, indicate the direction of the effect (i.e. which group is favoured). | **Yes** |
| **DISCUSSION** | | |  |
| Limitations of evidence | 9 | Provide a brief summary of the limitations of the evidence included in the review (e.g. study risk of bias, inconsistency and imprecision). | **Yes** |
| Interpretation | 10 | Provide a general interpretation of the results and important implications. | **Yes** |
| **OTHER** | | |  |
| Funding | 11 | Specify the primary source of funding for the review. | **Yes** |
| Registration | 12 | Provide the register name and registration number. | **NA** |

# Supplementary Tables

# **Supplementary Table S1. Attributes of Articles included in Meta-Analyses**

(Starts on next page)

| **District**  **(2020)** | **Sub-County**  **(2020)** | **Collection Year** | **Trapping?** | **Total Traps** | **Genome Study** | **FTD (Mean)** | **Total Captures** | **Glossina Spp Reported** | **Geocoded** | **Authors** |
| --- | --- | --- | --- | --- | --- | --- | --- | --- | --- | --- |
| Buvuma | Lyabaana | 2001 | Yes | 48 | No | Not Reported | 10528 | Glossina (Non-Specific) | Yes | Abila, 200748 |
| Apac | Akere Division | 2004 | No | - | Yes | Not Reported | 15 | Glossina (Non-Specific) | Yes | Abila, 200849 |
| Busia | Lumino | 12 |
| Masafu | 11 |
| Iganga | Namungalwe | 19 |
| Kamuli | Northern Division | 40 |
| Lira | Ojwina Division | 30 |
| Moyo | Moyo Town Council | 21 |
| Soroti | Kamuda | 8 |
| Tororo | Kisoko | 35 |
| Busia | Western Division | 2013 | No | - | Yes | Not Reported | 14 | Gff | No | Aksoy, 201450 |
| Dokolo | Dokolo Tc | 13 |
| Kaberamaido | Kaberamaido Town Council | 25 |
| Kalaki | Otuboi | 13 |
| Masindi | Pakanyi | 77 | Gpd,Gff,G morsitans |
| Bunyangabu | Rwimi | 2012 | No | - | Yes | Not Reported | 73 | Gff | No | Alam, 201251 |
| Busia | Busime | 68 |
| Butaleja | Butaleja Town Council | 99 |
| Buvuma | Busamuzi | 35 |
| Dokolo | Dokolo Tc | 28 |
| Kagadi | Ndaiga | 48 |
| Kalangala | Mugoye | 41 |
| Kibuku | Kadama | 69 |
| Masindi | Bwijanga | 47 |
| Moyo | Moyo | 81 |
| Mukono | Ntenjeru | 10 |
| Nakasongola | Kalungi | 118 |
| Nakitoma | 17 |
| Nwoya | Lii | 15 |
| Pallisa | Puti-Puti | 54 |
| Serere | Olio | 20 |
| Terego | Omugo | 20 |
| Wakiso | Katabi Town Council | 89 |
| Bugiri | Bulidha | 2010 | Yes | 1 | No | 0 | 0 |  | No | Albert, 201518 |
| Nabukalu | 1 | 0 | 0 |
| Nankoma | 1 | 0 | 0 |
| Bugweri | Bugweri Town Council | 2010 | Yes | 3 | No | 0.55 | 5 | Glossina (Non-Specific) | No |
| Buyanga | 24 | 1.61 | 116 |
| Ibulanku | 17 | 0.57 | 29 |
| Igombe | 6 | 0.72 | 13 |
| Makuutu | 25 | 0.87 | 65 |
| Namalemba | 26 | 1.47 | 115 |
| Buikwe | Buikwe | 2010 | Yes | 2 | No | 0 | 0 |  | No |
| Kawolo Division | 35 | 1.16 | 122 | Glossina (Non-Specific) | No |
| Najja | 45 | 0.46 | 64 |
| Najjembe Division | 51 | 0.74 | 113 |
| Ngogwe | 33 | 0.07 | 7 |
| Njeru Division | 36 | 0.15 | 16 |
| Nyenga Division | 43 | 0.54 | 69 |
| Ssi-Bukunja | 29 | 0.96 | 83 |
| Wakisi Division | 41 | 0.64 | 79 |
| Butaleja | Budumba | 2010 | Yes | 1 | No | 0 | 0 |  | No |
| Buvuma | Bweema | 2010 | Yes | 1 | No | 0.7 | 2 | Glossina (Non-Specific) | No |
| Buyende | Bugaya | 2010 | Yes | 32 | No | 1.12 | 108 | Glossina (Non-Specific) | No |
| Buyende | 8 | 0 | 0 |  |
| Buyende Town Council | 6 | 0 | 0 |
| Kagulu | 13 | 0 | 0 |
| Kidera | 30 | 0.06 | 5 | Glossina (Non-Specific) |
| Nkondo | 15 | 0.04 | 2 |
| Gomba | Mpenja | 2010 | Yes | 1 | No | 1 | 3 | Glossina (Non-Specific) | No |
| Iganga | Bulamogi | 2010 | Yes | 25 | No | 0.31 | 23 | Glossina (Non-Specific) | No |
| Nabitende | 21 | 0.08 | 5 |
| Nakalama | 13 | 0.51 | 20 |
| Nakigo | 22 | 0.39 | 26 |
| Nambale | 32 | 0.16 | 15 |
| Namungalwe | 24 | 0.17 | 12 |
| Nawandala | 24 | 0 | 0 |  |
| Nawanyingi | 7 | 0.14 | 3 | Glossina (Non-Specific) |
| Jinja | Budondo | 2010 | Yes | 11 | No | 1.45 | 48 | Glossina (Non-Specific) | No |
| Bugembe Town Council | 6 | 0 | 0 |  |
| Busedde | 12 | 0 | 0 |
| Butagaya | 16 | 0.41 | 20 | Glossina (Non-Specific) |
| Buwenge | 3 | 0 | 0 |  |
| Buwenge Town Council | 1 | 0 | 0 |
| Buyengo | 5 | 0 | 0 |
| Kakira Town Council | 7 | 0 | 0 |
| Mafubira | 5 | 0.86 | 13 | Glossina (Non-Specific) |
| Mpumudde Division | 1 | 0 | 0 |  |
| Kaliro | Budomero | 2010 | Yes | 16 | No | 0.02 | 1 | Gff | No |
| Bumanya | 5 | 0.13 | 2 |
| Buyinda | 2 | 0 | 0 |  |
| Gadumire | 18 | 0.13 | 7 | Gff |
| Kaliro Town Council | 2 | 0 | 0 |  |
| Kasokwe | 5 | 0.13 | 2 | Gff |
| Namugongo | 28 | 0.19 | 16 |
| Nansololo | 13 | 0 | 0 |  |
| Nawaikoke | 1 | 0 | 0 |
| Kampala | Kawempe Division | 2010 | Yes | 1 | No | 0 | 0 |  | No |
| Kamuli | Balawoli | 2010 | Yes | 5 | No | 0 | 0 |  | No |
| Bugulumbya | 13 | 0.18 | 7 | Glossina (Non-Specific) |
| Bulopa | 8 | 0 | 0 |  |
| Butansi | 14 | 0.31 | 13 | Glossina (Non-Specific) |
| Kagumba | 12 | 0 | 0 |  |
| Kisozi | 11 | 0.33 | 11 | Glossina (Non-Specific) |
| Kitayunjwa | 24 | 0.39 | 28 |
| Magogo | 7 | 0.52 | 11 |
| Mbulamuti | 11 | 0 | 0 |  |
| Nabwigulu | 13 | 0.33 | 13 | Glossina (Non-Specific) |
| Namasagali | 14 | 0.1 | 4 |
| Namwendwa | 21 | 0.17 | 11 |
| Nawanyago | 4 | 0 | 0 |  |
| Northern Division | 16 | 0.71 | 34 | Glossina (Non-Specific) |
| Southern Division | 11 | 0.27 | 9 |
| Wankole | 6 | 0 | 0 |  |
| Kayunga | Busaana | 2010 | Yes | 44 | No | 2.35 | 310 | Glossina (Non-Specific) | No |
| Kangulumira | 13 | 1.31 | 51 |
| Kayonza | 34 | 0 | 0 |  |
| Kayunga | 65 | 0 | 0 |  |
| Kitimbwa | 44 | 0.45 | 59 | Glossina (Non-Specific) |
| Nazigo | 14 | 2 | 84 |
| Luuka | Bukanga | 2010 | Yes | 6 | No | 0.22 | 4 | Glossina (Non-Specific) | No |
| Irongo | 20 | 0 | 0 |  |
| Nawampiti | 5 | 0 | 0 |
| Waibuga | 15 | 0.6 | 27 | Glossina (Non-Specific) |
| Luwero | Kikyusa | 2010 | Yes | 1 | No | 0 | 0 |  | No |
| Mayuge | Baitambogwe | 2010 | Yes | 11 | No | 1.06 | 35 | Gff | No |
| Bukabooli | 13 | 1.05 | 41 |
| Bukatube | 22 | 2.71 | 179 |
| Busakira | 8 | 1.25 | 30 |
| Buwaaya | 8 | 0.25 | 6 |
| Imanyiro | 4 | 0.83 | 10 |
| Kigandalo | 8 | 1 | 24 |
| Kityerera | 12 | 1.17 | 42 |
| Magamaga Town Council | 2 | 0.16 | 1 |
| Malongo | 17 | 1.14 | 58 |
| Mayuge Town Council | 1 | 3 | 9 |
| Mpungwe | 10 | 0.53 | 16 |
| Wairasa | 7 | 1.9 | 40 |
| Mukono | Central Division | 2010 | Yes | 10 | No | 0 | 0 |  | No |
| Goma Division | 34 | 0.05 | 5 | Glossina (Non-Specific) | No |
| Kasawo | 43 | 0.43 | 55 |
| Kimenyedde | 44 | 0.09 | 12 |
| Kyampisi | 32 | 0.1 | 10 |
| Mpatta | 16 | 0.12 | 6 |
| Mpunge | 6 | 0.95 | 17 |
| Nabbaale | 46 | 0.15 | 21 |
| Nagojje | 43 | 0.1 | 12 |
| Nakisunga | 36 | 0.19 | 21 |
| Nama | 44 | 0.04 | 5 |
| Ntenjeru | 43 | 1.9 | 246 |
| Ntunda | 35 | 0.07 | 8 |
| Seeta Namuganga | 37 | 0.43 | 48 |
| Namayingo | Buhemba | 2010 | Yes | 2 | No | 0 | 0 |  | No |
| Namutumba | Bulange | 2010 | Yes | 20 | No | 1.63 | 98 | Gff | No |
| Ivukula | 9 | 1.37 | 37 | Glossina (Non-Specific),Gff | No |
| Kibaale | 8 | 0.33 | 8 | Gff | No |
| Magada | 20 | 1.02 | 61 | No |
| Mazuba | 18 | 0.93 | 50 | No |
| Nabweyo | 10 | 2.9 | 87 | No |
| Namutumba | 37 | 3.83 | 425 | Gff,Glossina (Non-Specific) | No |
| Nangonde | 14 | 0.88 | 37 | Gff | No |
| Nsinze | 22 | 1.5 | 99 | Glossina (Non-Specific),Gff | No |
| Wakiso | Kira Division | 2010 | Yes | 2 | No | 0 | 0 |  | No |
| Apac | Agulu Division | 2010 | No | - | Yes | Not Reported | 15 | Gff | Yes | Beadell, 201052 |
| Arua | River Oli Division | 15 |
| Bunyangabu | Rwimi | 15 |
| Busia | Busime | 2010 | No | - | Yes | Not Reported | 15 | Gff | Yes |
| Western Division | 15 |
| Butaleja | Butaleja Town Council | 2010 | No | - | Yes | Not Reported | 15 | Gff | Yes |
| Buvuma | Lyabaana | 15 |
| Dokolo | Dokolo Tc | 15 |
| Goma | Maddu | 6 |
| Kagadi | Kagadi Town Council | 15 |
| Kitgum | Pandwong Division | 5 |
| Kumi | Mukongoro | 15 |
| Lira | Ogur | 10 |
| Masindi | Central Division | 2010 | No | - | Yes | Not Reported | 15 | Gff | Yes |
| Pakanyi | 15 |
| Moyo | Moyo Town Council | 2010 | No | - | Yes | Not Reported | 15 | Gff | Yes |
| Nakasongola | Kalungi | 15 |
| Pader | Pader Town Council | 10 |
| Serere | Bugondo | 13 |
| Wakiso | Katabi Town Council | 15 |
| Busia | Western Division | 2000 | No | NA | Yes | Not Reported | 31 | Gpd | No | Ciosi, 201453 |
| Koboko | Abuku | 2020 | No | - | No | Not Reported | 1666 | Glossina (Non-Specific) | No | Cunningham, 202019 |
| Ludara | 4998 |
| Busia | Buteba | 2008 | No | - | Yes | Not Reported | 39 | Gff | No | Echodu, 201154 |
| 2009 | 214 |
| Majanji | 2008 | 39 |
| 2009 | 243 |
| Butaleja | Kachonga | 2008 | No | - | Yes | Not Reported | 32 | Gff | No |
| 2009 | 154 |
| Kalaki | Otuboi | 2008 | No | - | Yes | Not Reported | 53 | Gff | No |
| 2009 | 223 |
| Kibuku | Nabiswa | 2009 | No | - | Yes | Not Reported | 40 | Gff | No |
| Kumi | Kanyum | 2008 | No | - | Yes | Not Reported | 40 | Gff | No |
| 2009 | 46 |
| Masindi | Bwijanga | 2008 | No | - | Yes | Not Reported | 40 | Gff | No |
| 2010 | 17 |
| Nakasongola | Kalungi | 2008 | No | - | Yes | Not Reported | 40 | Gff | No |
| 2010 | 18 |
| Bugweri | Namalemba | 2011 | Yes | 1 | Yes | Not Reported | 80 | Gff | No | Echodu, 201355 |
| Buikwe | Najja | 1 | 0 |  |
| Bukedea | Bukedea Town Council | 1 | 25 | Gff |
| Busia | Buteba | 3 | 253 |
| Majanji | 4 | 470 |
| Masinya | 1 | 2 |
| Butaleja | Kachonga | 3 | 204 |
| Butambala | Ngando | 1 | 0 |  |
| Buyende | Bugaya | 2010 | Yes | 2 | Yes | Not Reported | 0 |  | No |
| Kagulu | 1 | 0 |
| Dokolo | Dokolo Tc | 2011 | Yes | 1 | Yes | Not Reported | 53 | Gff | No |
| Jinja | Budondo | 1 | 0 |  |
| Kaberamaido | Alwa | 1 | 400 | Gff |
| Kalaki | Otuboi | 2 | 276 |
| Kaliro | Bukamba | 2010 | Yes | 1 | Yes | Not Reported | 0 |  | No |
| Kayunga | Bbaale | 2011 | Yes | 1 | Yes | Not Reported | 0 |  | No |
| Busaana | 2 | 1 | Gff |
| Kayonza | 2 | 0 |  |
| Kibuku | Nabiswa | 2011 | Yes | 2 | Yes | Not Reported | 223 | Gff | No |
| Kiryandongo | Masindi Port | 1 | 0 |  |
| Kumi | Kanyum | 3 | 86 | Gff |
| Luuka | Bulongo | 1 | 0 |  |
| Luwero | Butuntumula | 2011 | Yes | 1 | Yes | Not Reported | 0 |  | No |
| Kamira | 1 | 0 |
| Wobulenzi Town Council | 2 | 0 |
| Masindi | Bwijanga | 2011 | Yes | 3 | Yes | Not Reported | 127 | Gff | No |
| Mayuge | Bukatube | 1 | 83 |
| Mpigi | Nkozi | 1 | 0 |  |
| Mukono | Kasawo | 2011 | Yes | 3 | Yes | Not Reported | 0 |  | No |
| Nagojje | 1 | 0 |
| Nakaseke | Wakyato | 2011 | Yes | 1 | Yes | Not Reported | 0 |  | No |
| Nakasongola | Kalungi | 2011 | Yes | 3 | Yes | Not Reported | 61 | Gff | No |
| Nakitoma | 2 | 34 |
| Namutumba | Namutumba | 2011 | Yes | 1 | Yes | Not Reported | 150 | Gff | No |
| Nwoya | Lii | 2 | 282 |
| Pallisa | Puti-Puti | 1 | 34 |
| Tororo | Magola | 2011 | Yes | 2 | Yes | Not Reported | 45 | Gff | No |
| Molo | 1 | 12 |
| Wakiso | Division A | 2011 | Yes | 2 | Yes | Not Reported | 0 |  | No |
| Busia | Buhehe | 2016 | Yes | 2 | No | 0 | 0 |  | No | Egeru, 202056 |
| Masaba | 1 | 17.67 | 53 | G morsitans |
| Kaabong | Kaabong East | 2016 | Yes | 10 | No | 0 | 0 |  | No |
| Kaabong Town Council | 11 | 0 | 0 |
| Kaabong West | 13 | 0 | 0 |
| Kakamar | 7 | 0 | 0 |
| Kalapata | 15 | 0 | 0 |
| Kamion | 16 | 0.06 | 3 | G morsitans |
| Kathile | 14 | 0 | 0 |  |
| Kathile South | 10 | 0 | 0 |
| Lodiko | 5 | 0 | 0 |
| Lolelia | 13 | 0.62 | 24 | G morsitans |
| Lotim | 6 | 0 | 0 |  |
| Loyoro | 3 | 4.78 | 43 | G morsitans |
| Sidok | 11 | 28.24 | 932 |
| Karenga | Kapedo | 2016 | Yes | 7 | No | 0.05 | 1 | G morsitans | No |
| Karenga Town Council | 14 | 6.14 | 258 |
| Kawalakol | 23 | 15.57 | 1074 |
| Lobalangit | 18 | 9 | 486 |
| Lokori | 8 | 132.96 | 3191 |
| Napore Karenga | 17 | 46.04 | 2348 |
| Sangar | 21 | 4.63 | 292 |
| Kitgum | Orom | 2016 | Yes | 2 | No | 2.67 | 16 | G morsitans | No |
| Kotido | Central Division | 2016 | Yes | 1 | No | 0 | 0 |  | No |
| Kacheri | 33 | 0.65 | 64 | G morsitans |
| Nakapelimoru | 26 | 0.21 | 16 |
| North Division | 6 | 0 | 0 |  |
| Panyangara | 18 | 0 | 0 |
| Rengen | 7 | 2.1 | 44 | G morsitans |
| South Division | 7 | 0 | 0 |  |
| West Division | 5 | 0 | 0 |
| Masindi | Pakanyi | 2018 | No | - | Yes | Not Reported | 45 | Gpd | No | Griffith, 201857 |
| Tororo | Iyolwa | 1990 | No | - | Yes | Not Reported | 6 | Gff | Yes | Hide, 199458 |
| Busia | Busime | 2008 | No | - | Yes | Not Reported | 39 | Gff | No | Hyseni, 201259 |
| 2009 | 80 |
| Buvuma | Bugaya | 2010 | No | - | Yes | Not Reported | 62 | Gff | No |
| Buwooya | 2008 | 39 |
| 2009 | 79 |
| 2010 | 46 |
| Bweema | 2010 | 18 |
| Nairambi | 60 |
| Jinja | Budondo | 2011 | No | - | Yes | Not Reported | 35 | Gff | No |
| Kalangala | Bujumba | 2009 | No | - | Yes | Not Reported | 40 | Gff | No |
| Mugoye | 2010 | 32 |
| Masaka | Bukakata | 2011 | No | - | Yes | Not Reported | 33 | Gff | No |
| Mukono | Koome Island | 2010 | No | - | Yes | Not Reported | 88 | Gff | No |
| Wakiso | Division A | 2011 | No | - | Yes | Not Reported | 35 | Gff | No |
| Kasese | Central Division | 2017 | Yes | 4 | No | Not Reported | 12078 | Gpd; Gff | No | Kangume, 202060 |
| Kitswamba | 2 | 10 |
| Lake Katwe | 2 | 28105 |
| Muhokya | 2 | 565 |
| Nyamwamba Division | 2 | 319 |
| Tororo | Osukuru | 2010 | No | - | Yes | Not Reported | 12 | Gpd | No | Kariithi, 201361 |
| Busia | Busime | 2011 | No | - | Yes | Not Reported | 36 | Gff | No | Kato, 201562 |
| Majanji | 15 |
| Buvuma | Bugaya | 2011 | No | - | Yes | Not Reported | 49 | Gff | No |
| Buwooya | 78 |
| Bweema | 9 |
| Nairambi | 73 |
| Jinja | Budondo | 2011 | No | - | Yes | Not Reported | 31 | Gff | No |
| Kalangala | Mugoye | 2011 | No | - | Yes | Not Reported | 34 | Gff | No |
| Masaka | Bukakata | 2011 | No | - | Yes | Not Reported | 26 | Gff | No |
| Mayuge | Bukatube | 2011 | No | - | Yes | Not Reported | 11 | Gff | No |
| Mukono | Koome Island | 2011 | No | - | Yes | Not Reported | 43 | Gff | No |
| Mpunge | 15 |
| Tororo | Magola | 2011 | No | - | Yes | Not Reported | 15 | Gff | No |
| Wakiso | Division A | 2011 | No | - | Yes | Not Reported | 35 | Gff | No |
| Katabi Town Council | 15 |
| Mukono | Central Division | 1993 | No | - | No | 11.3 | 45 | Glossina (Non-Specific) | Yes | Katunguka-Rwakishaya, 199663 |
| Busia | Lunyo | 2000 | No | - | Yes | Not Reported | 0 | Gff | No | Krafsur, 200864 |
| Iganga | Nawandala | 1987 | No | NA | No | 1.2 | 240 | Gff | Yes | Lancien, 199065 |
| Kaliro | Budomero | 1987 | No | - | No | 0.8 | 64 | Gff | Yes |
| Bumanya | 1.2 | 332 |
| Buyinda | 2.5 | 125 |
| Kaliro Town Council | 1.7 | 236 |
| Kasokwe | 3.4 | 476 |
| Namugongo | 0.6 | 126 |
| Kamuli | Butansi | 1987 | No | - | No | 0.6 | 84 | Gff | Yes |
| Kibuku | Lwamata | 0.9 | 9 |
| Mayuge | Imanyiro | 0.5 | 100 |
| Nakasongola | Nabisweera | 1987 | No | - | No | 0.9 | 72 | Gff | Yes |
| Ivukula | 0.7 | 56 |
| Magada | 0.3 | 28 |
| Mazuba | 1.3 | 156 |
| Namutumba | 1.5 | 150 |
| Nangonde | 1.73 | 348 |
| Kaabong | Kaabong East | 2016 | Yes | 10 | No | 0 | 0 |  | No | MAAIF, 201666 |
| Kaabong Town Council | 11 | 0 | 0 |
| Kaabong West | 13 | 0 | 0 |
| Kakamar | 7 | 0 | 0 |
| Kalapata | 14 | 0 | 0 |
| Kamion | 16 | 0.06 | 3 | G morsitans |
| Kathile | 14 | 0 | 0 |  |
| Kathile South | 10 | 0 | 0 |
| Lodiko | 19 | 0 | 0 |
| Lolelia | 30 | 2.14 | 193 | G morsitans |
| Lotim | 6 | 0 | 0 |  |
| Loyoro | 26 | 1.51 | 118 | G morsitans |
| Sidok | 38 | 19.54 | 2228 |
| Karenga | Kapedo | 2016 | Yes | 8 | No | 0.04 | 1 | G morsitans | No |
| Karenga Town Council | 15 | 5.84 | 263 |
| Kawalakol | 23 | 16 | 1104 |
| Lobalangit | 19 | 8.81 | 502 |
| Lokori | 8 | 132.95 | 3191 |
| Napore Karenga | 17 | 46.45 | 2369 |
| Sangar | 21 | 5.48 | 345 |
| Kotido | Central Division | 2016 | Yes | 1 | No | 0 | 0 |  | No |
| Kacheri | 48 | 0.92 | 132 | G morsitans |
| Nakapelimoru | 26 | 0.4 | 31 |
| North Division | 6 | 0 | 0 |  |
| Panyangara | 18 | 0 | 0 |
| Rengen | 7 | 2.1 | 44 | G morsitans |
| South Division | 7 | 0 | 0 |  |
| West Division | 5 | 0.27 | 4 | G morsitans |
| Mbale | Northern Division | 1997 | Yes | 3 | No | 0.33 | 18 | Gff | Yes | Magona, 199767 |
| Tororo | Kwapa | 1997 | Yes | 1 | No | 0 | 0 |  | Yes |
| Osukuru | 3 | 1.27 | 69 | Gff; Gpd |
| Tororo | Kwapa | 1991 | No | NA | No | 0.05 | 0 | Gff | No | Magona, 199868 |
| Tororo | Eastern Division | 1999 | Yes | 2 | No | 0.73 | 0 | Gff | Yes | Magona, 200069 |
| Tororo | Eastern Division | 2002 | Yes | 22 | No | 0.19 | 136 | Gpd;Gff | Yes | Magona, 200570 |
| Mella | 2 | 0 | 0 |  |
| Osukuru | 4 | 0.01 | 1 | Gff |
| Arua | Aroi | 2019 | Yes | 4 | No | 1.85 | 89 | Glossina (Non-Specific) | No | Maxamhud, 202271 |
| Manibe | 5 | 1.83 | 110 |
| Maracha | Kijomoro | 2019 | Yes | 10 | No | 0.62 | 74 | Glossina (Non-Specific) | No |
| Maracha Town Council | 1 | 0 | 0 |
| Nyadri | 1 | 0.25 | 3 |
| Oluvu | 12 | 0.71 | 102 |
| Tara | 1 | 0.25 | 3 |
| Yivu | 5 | 0.63 | 38 |
| Terego | Katrini | 2019 | Yes | 4 | No | 0.9 | 43 | Glossina (Non-Specific) | No |
| Omugo | 2019 | Yes | 17 | No | 0.63 | 128 | Glossina (Non-Specific) | No |
| Bugiri | Buluguyi | 2013 | Yes | 1 | No | 0 | 0 |  | No | Muhanguzi, 201472 |
| Busia | Busitema | 2013 | Yes | 1 | No | 0.6 | 2 | Gff; Gpd | No |
| Butaleja | Busabi | 2013 | Yes | 1 | No | 0 | 0 |  | No |
| Busolwe Town Council | 1 | 0 | 0 |
| Himutu | 2 | 0 | 0 |
| Manafwa | Bunabwana | 2013 | Yes | 1 | No | 0 | 0 |  | No |
| Butiru | 2 | 0.15 | 1 | Gpd |
| Namisindwa | Namboko | 2013 | Yes | 2 | No | 0 | 0 |  | No |
| Tororo | Eastern Division | 2013 | Yes | 2 | No | 0.5 | 3 | Gff; Gpd | No |
| Iyolwa | 14 | 0.46 | 20 |
| Kirewa | 19 | 0 | 0 |  |
| Kisoko | 9 | 1.02 | 28 | Gff; Gpd |
| Kwapa | 16 | 0 | 0 |  |
| Magola | 10 | 0.84 | 26 | Gff; Gpd |
| Malaba Town Council | 2 | 0 | 0 |  |
| Mella | 15 | 0 | 0 |  |
| Merikit | 17 | 0.19 | 10 | Gff; Gpd |
| Molo | 24 | 0.27 | 20 |
| Mukuju | 20 | 0.22 | 14 |
| Mulanda | 15 | 0.72 | 33 |
| Nabuyoga | 19 | 0.28 | 17 |
| Nagongera | 5 | 0.06 | 1 |
| Nagongera Town Council | 9 | 3.07 | 83 |
| Osukuru | 21 | 1.77 | 113 |
| Paya | 18 | 0.42 | 23 |
| Petta | 6 | 0.87 | 16 |
| Rubongi | 13 | 0.95 | 38 |
| Sop-Sop | 16 | 0.14 | 7 |
| Western Division | 3 | 0.87 | 8 |
| Dokolo | Amwoma | 2022 | Yes | 4 | No | 2.83 | 34 | Glossina (Non-Specific) | Yes | Muhanguzi, n.d.73 |
| Dokolo Tc | 4 | 0.25 | 3 |
| Kangai | 4 | 1.75 | 21 |
| Okwalongwen | 4 | 5.75 | 69 |
| Kaberamaido | Kaberamaido | 2022 | Yes | 8 | No | 1.71 | 41 | Glossina (Non-Specific) | Yes |
| Kaberamaido Town Council | 34 | 2.9 | 296 |
| Busia | Eastern Division | 2009 | No | - | No | Not Reported | 0 |  | No | Muturi, 201174 |
| Butaleja | Busaba | 0 |
| Tororo | Rubongi | 0 |
| Serere | Kateta | 2002 | No | - | No | 10.1 | 303 | Glossina (Non-Specific) | No | Ocaido, 200575 |
| Olio | 3.5 | 105 |
| Buvuma | Busamuzi | 2006 | No | - | No | 41.8 | 4320 | Gff | Yes | Ogwal, 200745 |
| Nakaseke | Ngoma Town Council | 1989 | No | - | No | Not Reported | 0 | Gpd | No | Okello-Onen, 199476 |
| Busia | Masafu | 1991 | No | - | No | Not Reported | 0 | Gff | No | Okiria, 200277 |
| Tororo | Magola | 1988 | No | - | No | 3.79 | 0 | Gff | No | Okoth, 199178 |
| Apac | Akere Division | 2008 | No | - | Yes | Not Reported | 15 | Gff | Yes | Opiro, 201679 |
| 2014 | 29 |
| Oluko | 2008 | 15 |
| 2014 | 25 |
| Dokolo | Okwongodul | 2011 | No | - | Yes | Not Reported | 30 | Gff | Yes |
| 2014 | 25 |
| Kaberamaido | Kobulubulu | 2011 | No | - | Yes | Not Reported | 20 | Gff | Yes |
| 2014 | 25 |
| Kiryandongo | Kiryandongo | 2010 | No | - | Yes | Not Reported | 60 | Gff | Yes |
| 2014 | 25 |
| Kitgum | Orom | 2012 | No | - | Yes | Not Reported | 17 | Gff | Yes |
| 2014 | 20 |
| Kole | Ayer | 2010 | No | - | Yes | Not Reported | 15 | Gff | Yes |
| 2014 | 20 |
| Moyo | Moyo | 2009 | No | - | Yes | Not Reported | 15 | Gff | Yes |
| 2014 | 20 |
| Pader | Lapul | 2008 | No | - | Yes | Not Reported | 13 | Gff | Yes  Yes |
| 2014 | 15 |
| Adjumani | Adropi | 2014 | No | - | Yes | Not Reported | 20 | Gff | No | Opiro, 201780 |
| Arinyapi | 9 |
| Dzaipi | 24 |
| 2015 | 20 |
| Agago | Wol | 2008 | No | - | Yes | Not Reported | 13 | Gff | No |
| Amuru | Attiak | 2014 | No | - | Yes | Not Reported | 51 | Gff | No |
| Apac | Agulu Division | 2008 | No | - | Yes | Not Reported | 15 | Gff | No |
| Dokolo | - | 2011 | No | - | Yes | Not Reported | 94 | Gff | No |
| 2014 | 25 |
| Kangai | 2015 | 20 |
| Kaberamaido | Alwa | 2011 | No | - | Yes | Not Reported | 20 | Gff | No |
| 2014 | 25 |
| Kitgum | Labongo Akwang | 2014 | No | - | Yes | Not Reported | 65 | Gff | No |
| Labongo Amida | 2012 | No | - | Yes | 17 | Gff | No |
| Kole | Aboke | 2010 | No | - | Yes | Not Reported | 15 | Gff | No |
| 2014 | 50 |
| Kwania | Inomo | 2014 | No | - | Yes | Not Reported | 29 | Gff | No |
| Lamwo | Lokung | 2014 | No | - | Yes | Not Reported | 38 | Gff | No |
| Padibe West | 17 |
| Lira | Aromo | 2014 | No | - | Yes | Not Reported | 25 | Gff | No |
| Masindi | Bwijanga | 2010 | No | - | Yes | Not Reported | 30 | Gff | No |
| Moyo | Lefori | 2014 | No | - | Yes | Not Reported | 8 | Gff | No |
| Metu | 20 |
| Moyo | 2009 | 15 |
| Nakasongola | Nakitoma | 2010 | No | - | Yes | Not Reported | 34 | Gff | No |
| Nwoya | Lii | 2010 | No | - | Yes | Not Reported | 60 | Gff | No |
| 2014 | 25 |
| Obongi | Itula | 2015 | No | - | Yes | Not Reported | 10 | Gff | No |
| Oyam | Iceme | 2014 | No | - | Yes | Not Reported | 20 | Gff | No |
| Loro | 25 |
| Pader | Atanga | 2014 | No | - | Yes | Not Reported | 15 | Gff | No |
| Pader | 21 |
| Terego | Omugo | 2008 | No | - | Yes | Not Reported | 15 | Gff | No |
| 2014 | 64 |
| Adjumani | Adropi | 2015 | Yes | 1 | No | 2.7 | 81 | Gff | No | Opiro, 202117 |
| Arinyapi | 1 | 1.06 | 35 |
| Dzaipi | 2 | 2.61 | 176 |
| Itirikwa | 1 | 0.93 | 28 |
| Moyo | Lefori | 2015 | Yes | 1 | No | 2.39 | 79 | Gff | No |
| Metu | 2 | 2.48 | 182 |
| Moyo | 2 | 0.62 | 41 |
| Otuke | Alango | 2022 | Yes | 1 | No | 2.15 | 71 | Gff | No | Opiro, 202221  Otim, 200481 |
| Orum | 2 | 1.02 | 55 |
| Otuke Town Council | 1 | 2.69 | 97 |
| Oyam | Iceme | 2022 | Yes | 2 | No | 1.92 | 125 | Gff | No |
| Loro | 2 | 3.45 | 369 |
| Ssembabule | Lugusulu | 2000 | Yes | 5 | No | 0 | 0 |  | No |
| Sembabule Town Council | 10 | 0 | 0 |
| Busia | Buteba | 2008 | No | - | Yes | Not Reported | 21 | Gpd | No | Ouma, 201182 |
| Kagadi | Ndaiga | 16 |
| Nwoya | Got Apwoyo | 19 |
| Arua | Aroi | 2010 | Yes | 1 | No | 5.67 | 17 | Glossina (Non-Specific) | No | Stanton, 201883 |
| Manibe | 1 | 35.33 | 106 |
| Pajulu | 1 | 1 | 1 |
| Koboko | Dranya | 2010 | Yes | 4 | No | 24.33 | 292 | Glossina (Non-Specific) | No |
| Ludara | 1 | 0.33 | 1 |
| Midia | 19 | 1.42 | 79 |
| Southern Division | 1 | 10 | 10 |
| Maracha | Kijomoro | 2010 | Yes | 2 | No | 45.17 | 271 | Glossina (Non-Specific) | No |
| Maracha Town Council | 10 | 10.34 | 325 |
| Nyadri | 3 | 31.72 | 218 |
| Oleba | 11 | 1.03 | 34 |
| Tara | 10 | 21.22 | 623 |
| Yivu | 19 | 7.03 | 333 |
| Terego | Aii-Vu | 2010 | Yes | 17 | No | 5.25 | 186 | Glossina (Non-Specific) | No |
| Bileafe | 3 | 20.56 | 185 |
| Katrini | 22 | 16.97 | 986 |
| Odupi | 21 | 4.29 | 317 |
| Omugo | 73 | 2.84 | 549 |
| Uriama | 5 | 51.4 | 771 |
| Yumbe | Drajini | 2010 | Yes | 9 | No | 10.2 | 271 | Glossina (Non-Specific) | No |
| Odravu | 3 | 0.33 | 2 |
| Kamuli | Northern Division | 2000 | No | - | No | Not Reported | 728 | Gff | Yes | Waiswa, 200622 |
| Mukono | Koome Island | 414 |
| Tororo | Kisoko | 1172 | Gff; Gpd |

# Supplementary Figures


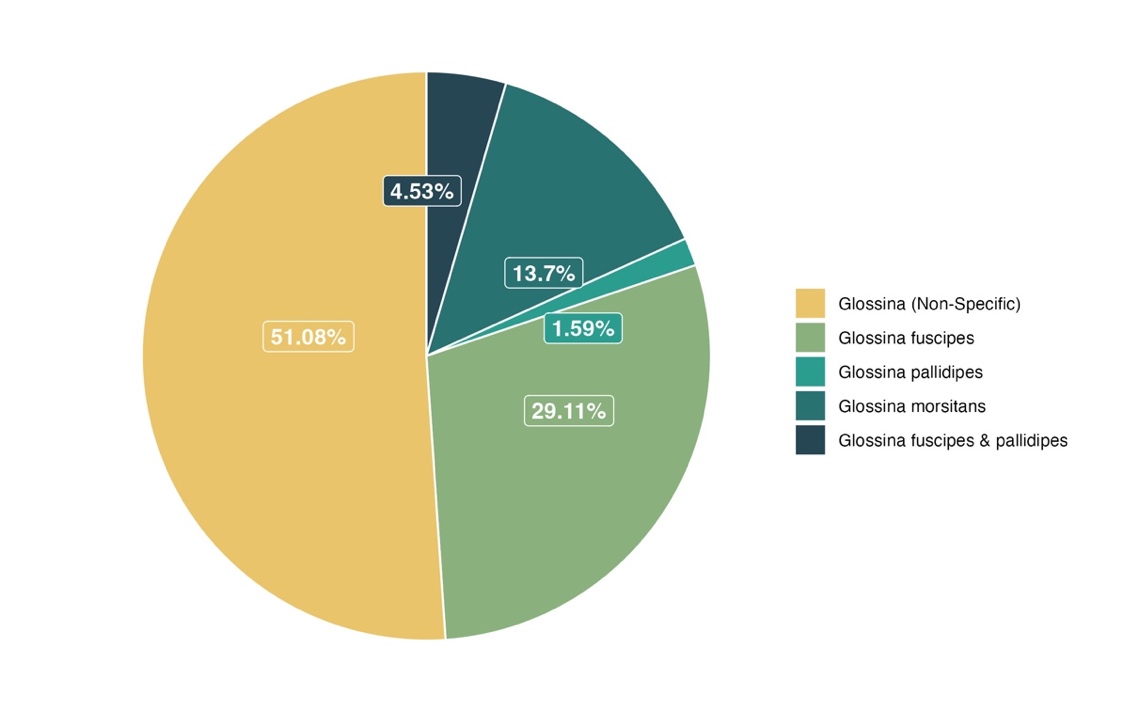


**Figure S1.** Pie Chart describing the proportion of records which reported tsetse fly captures (*n* = 1,696 records) and the *Glossina* species reported (*k* = 42 publications). Glossina (non-specific) refers to records where speciation was not performed. Over half of records (*n* = 2,317) reported zero tsetse fly captures.


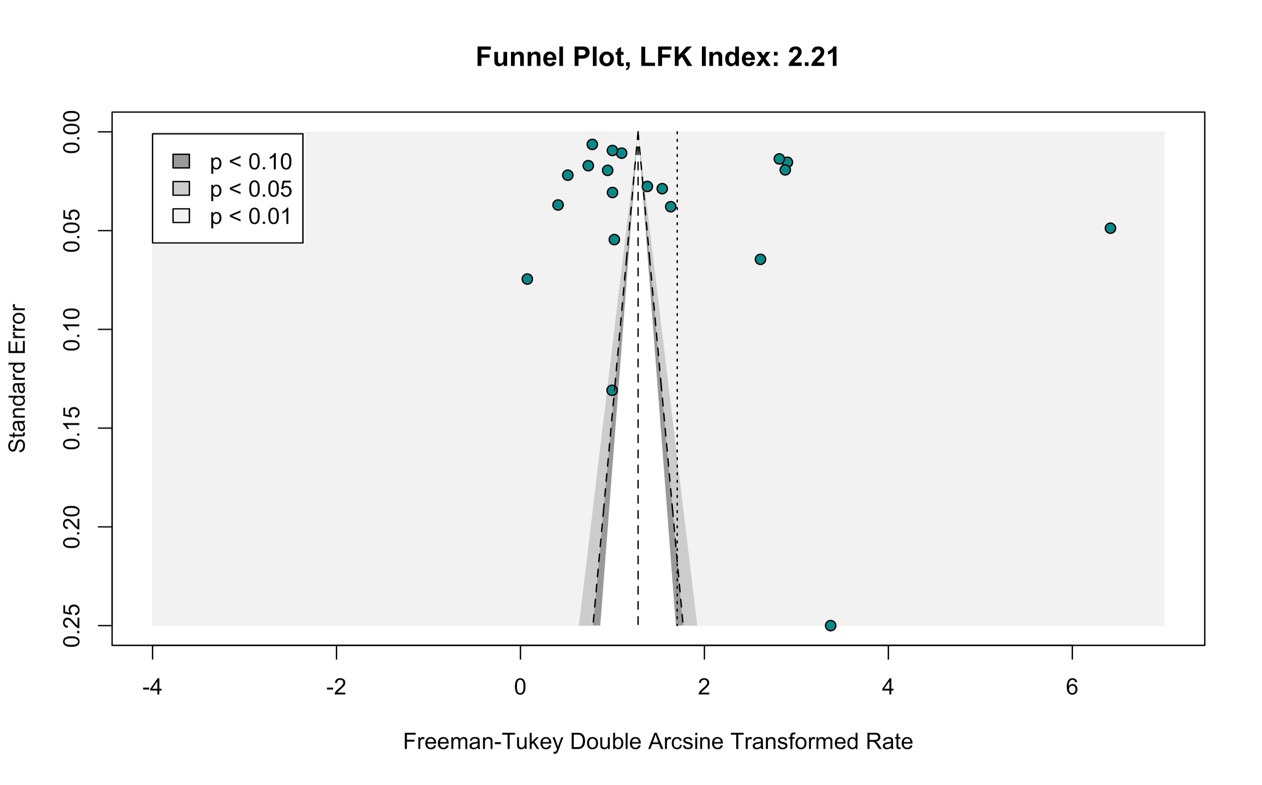


**Supplementary Figure S2.** Publication Bias, Funnel Plot**.** Contour bands denote significance levels for common effects reference value.LFK values29 more extreme than 2 indicate publication bias

**
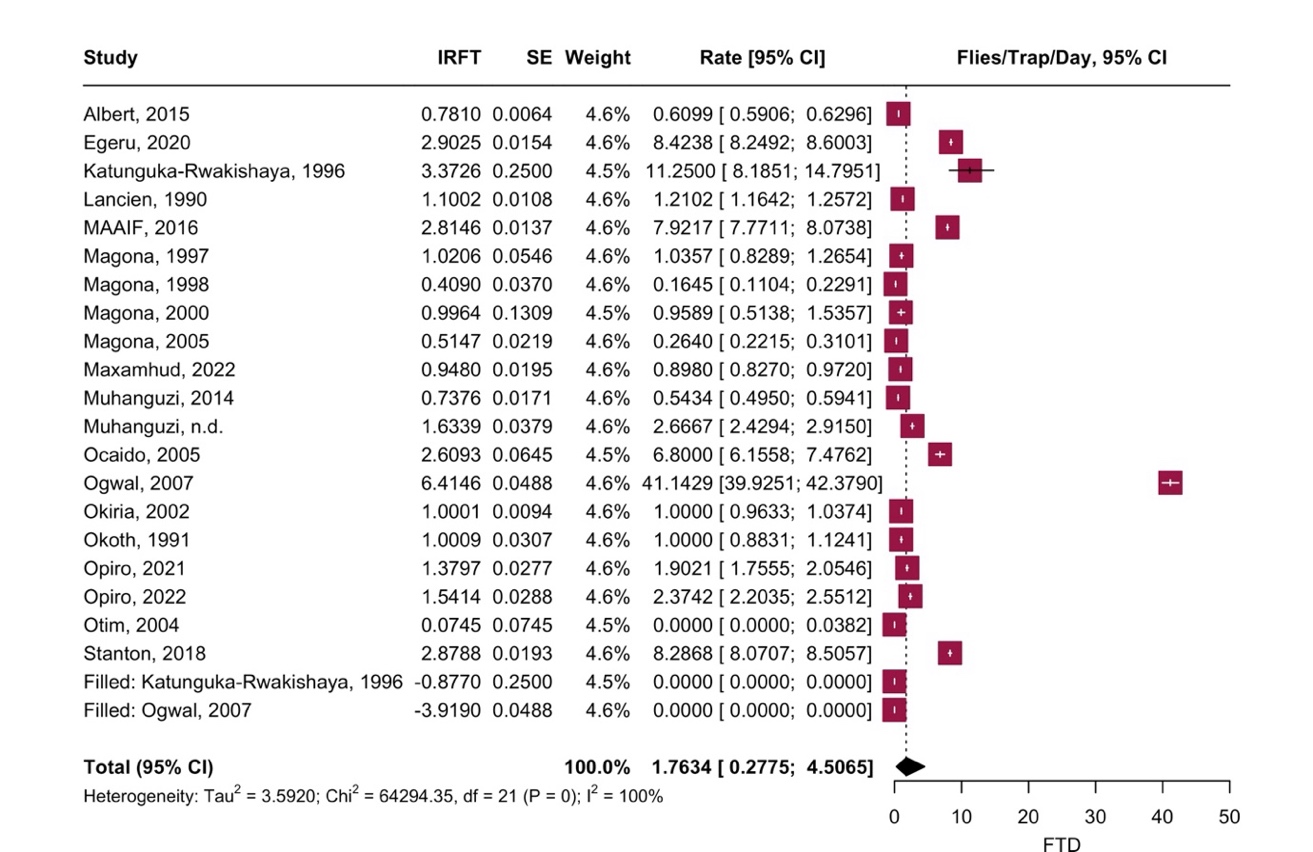
**

**Supplementary Figure S3.** Trim-and-Fill Imputed FTD Forest Plot results, adjusting for publication bias


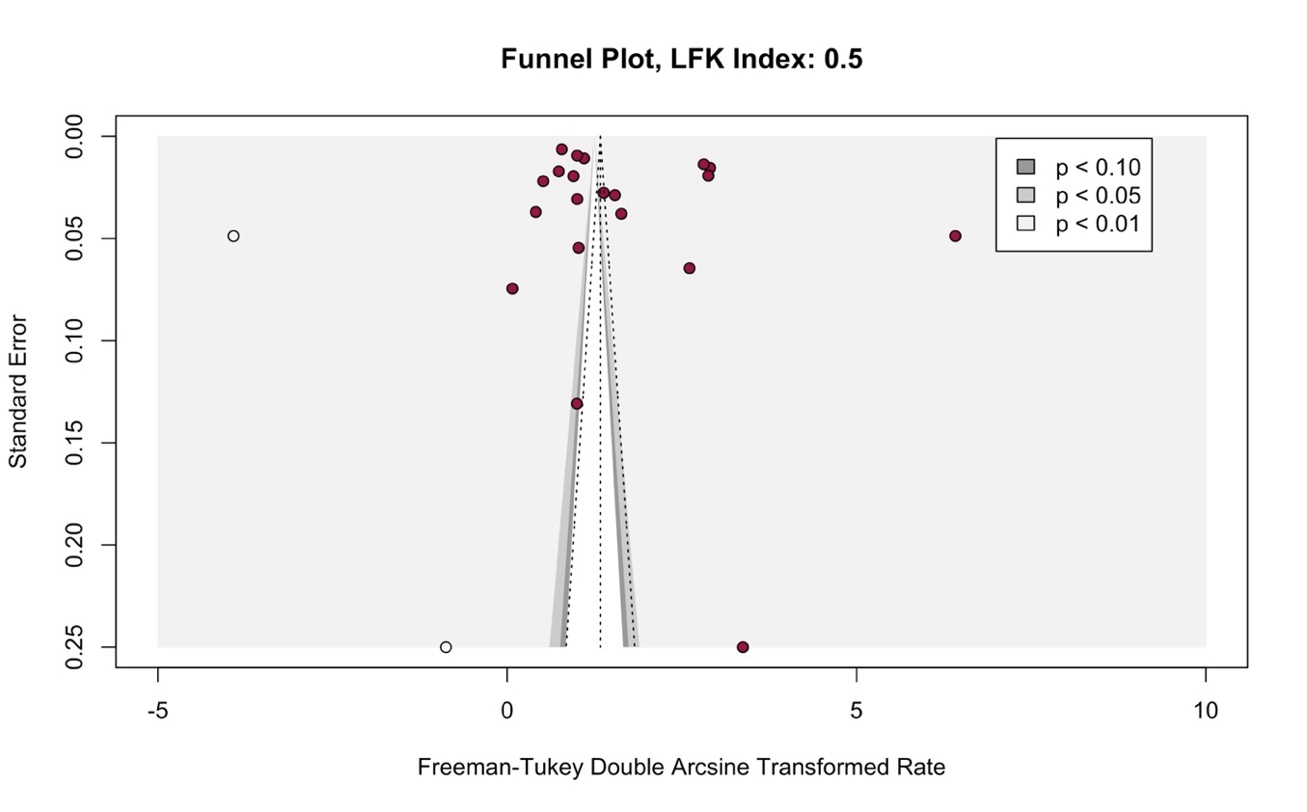


**Supplementary Figure S4.** Funnel Plot of Trim-and-Fill imputed effect sizes**.** LFK values29 more extreme than 2 indicate publication bias


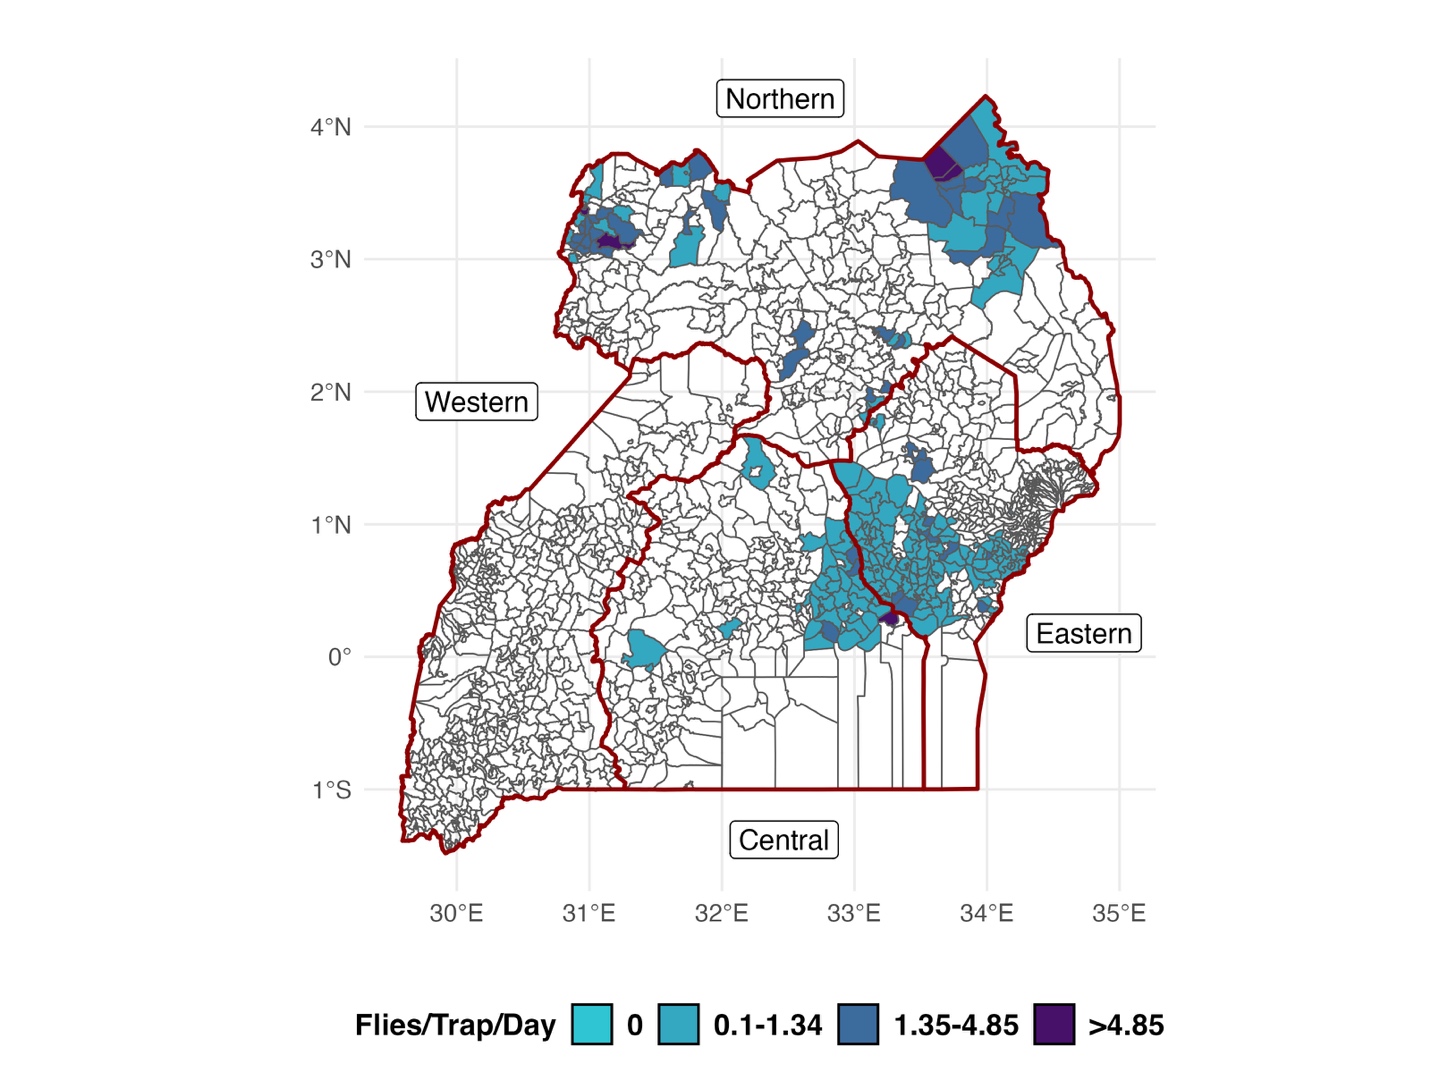


**Supplementary Figure S5.** Tsetse flies/trap/day estimates by Sub-County, all *Glossina* species. Uses Jenks natural breaks obtained from district-level estimates for class definitions. No sub-county estimated an FTD of zero. Subnational boundaries (i.e., regions) are denoted by thick red borders.

| 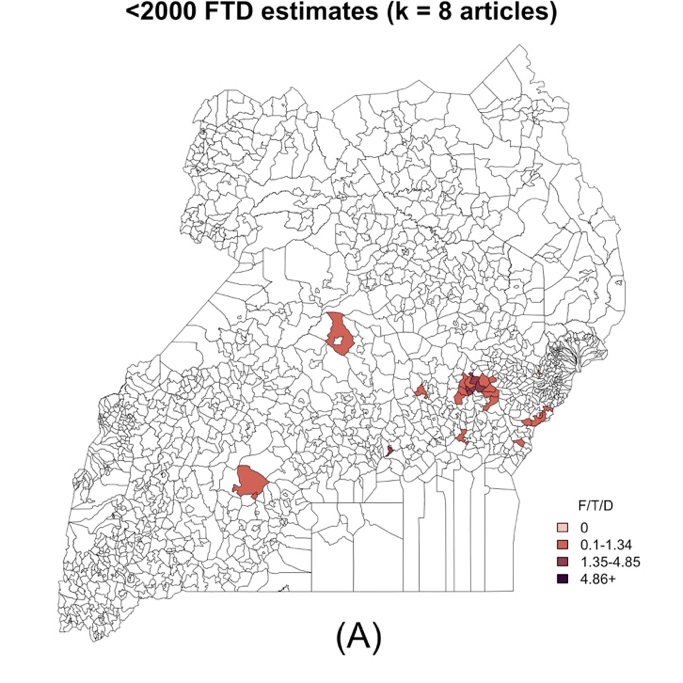 | 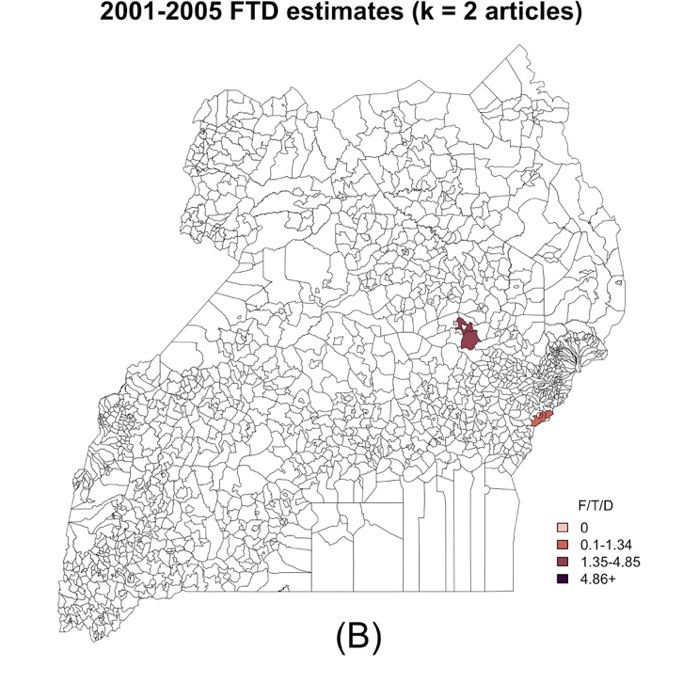 | | 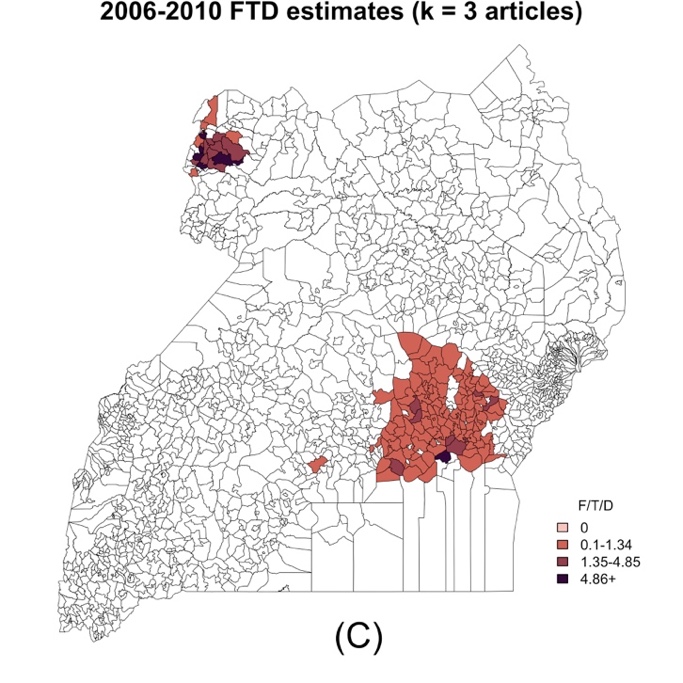 |
| --- | --- | --- | --- |
| 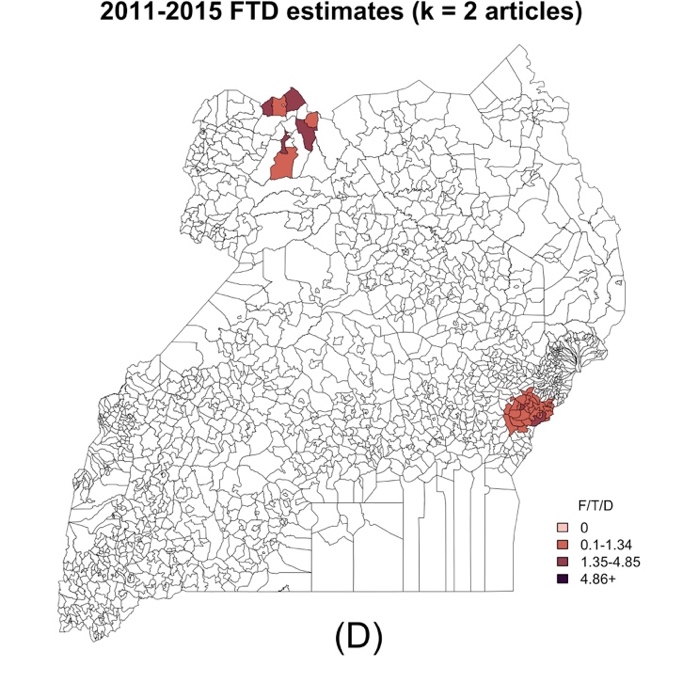 | | 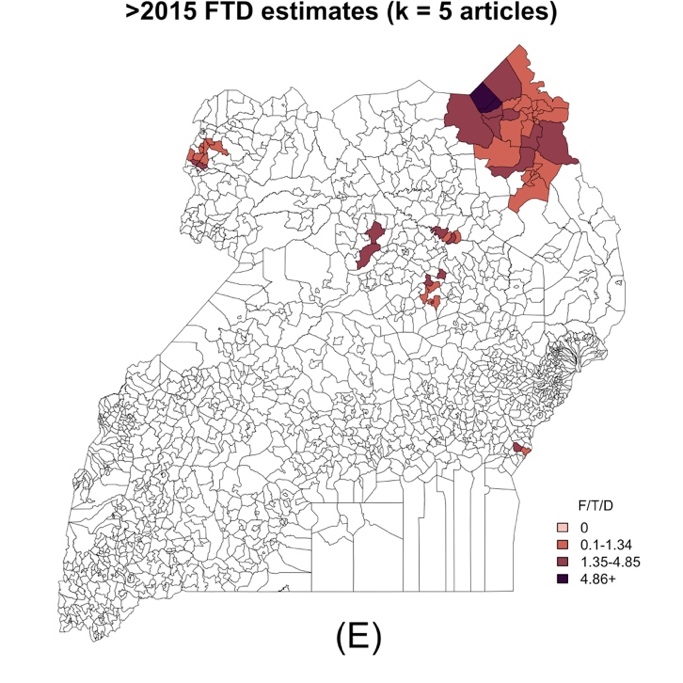 | |
| **Supplementary Figure S6.** Meta-Analysis (k = 19 publications) sub-CountyFTD estimates by tsetse fly collection time period. Jenks natural breaks from Figure 2 in the main manuscript | | | |

| 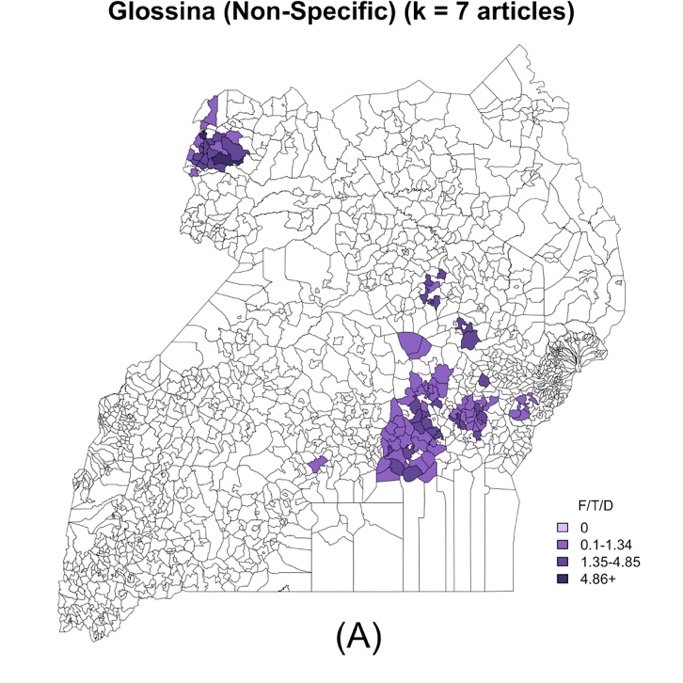 | 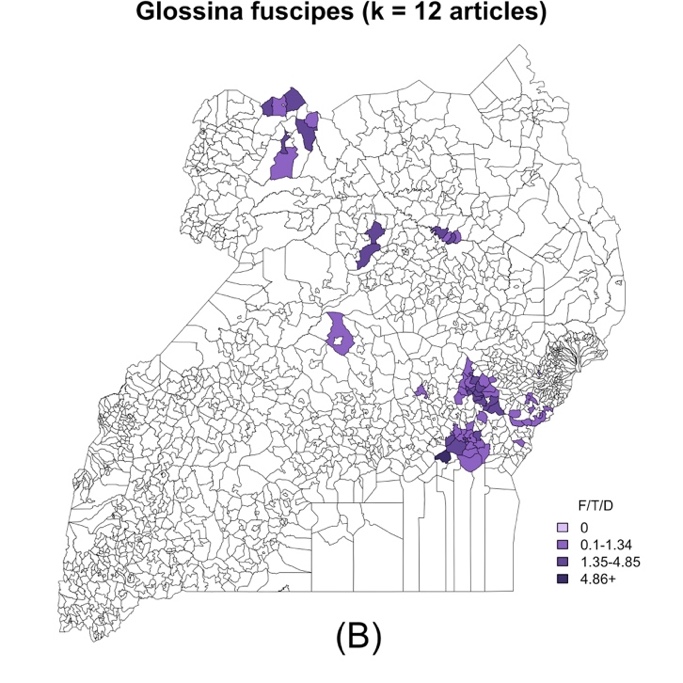 | | 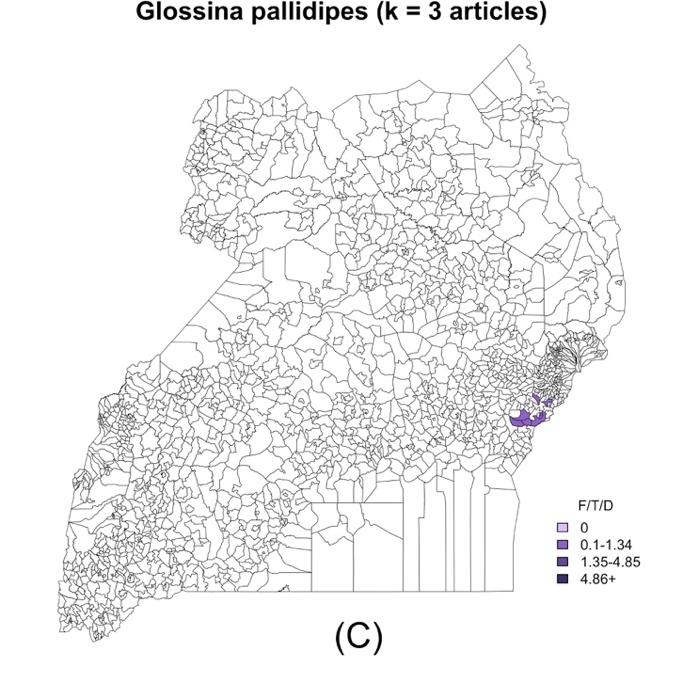 |
| --- | --- | --- | --- |
| 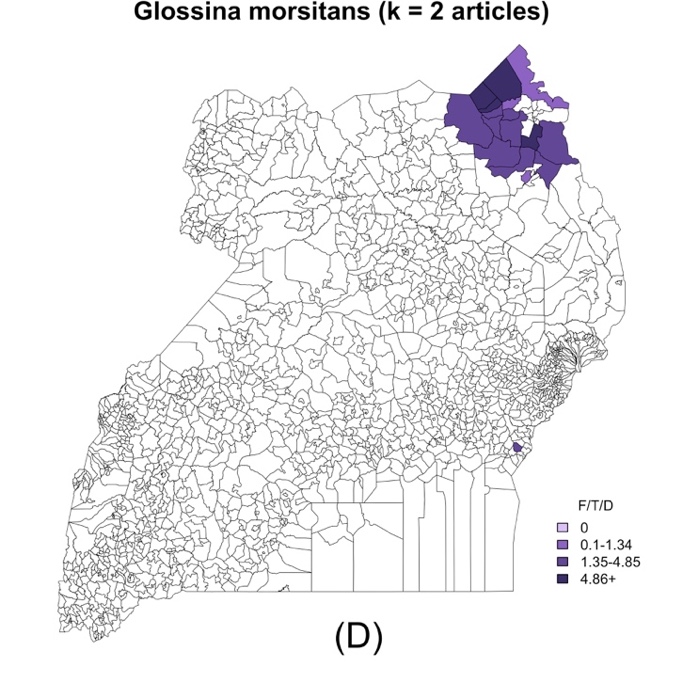 | | 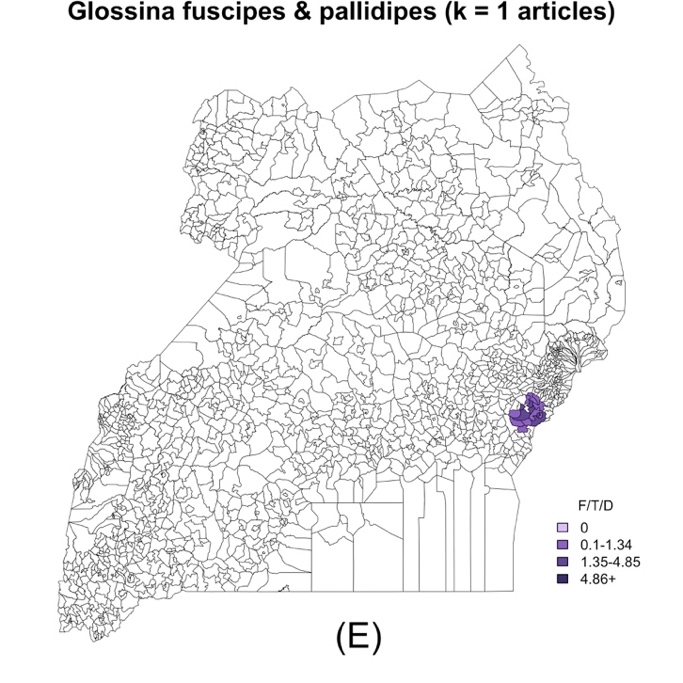 | |
| **Supplementary Figure S7.** Meta-Analysis (k = 20 publications),sub-countyFTD estimates by *Glossina* species reported. Jenks natural breaks used from Fig. 1 | | | |


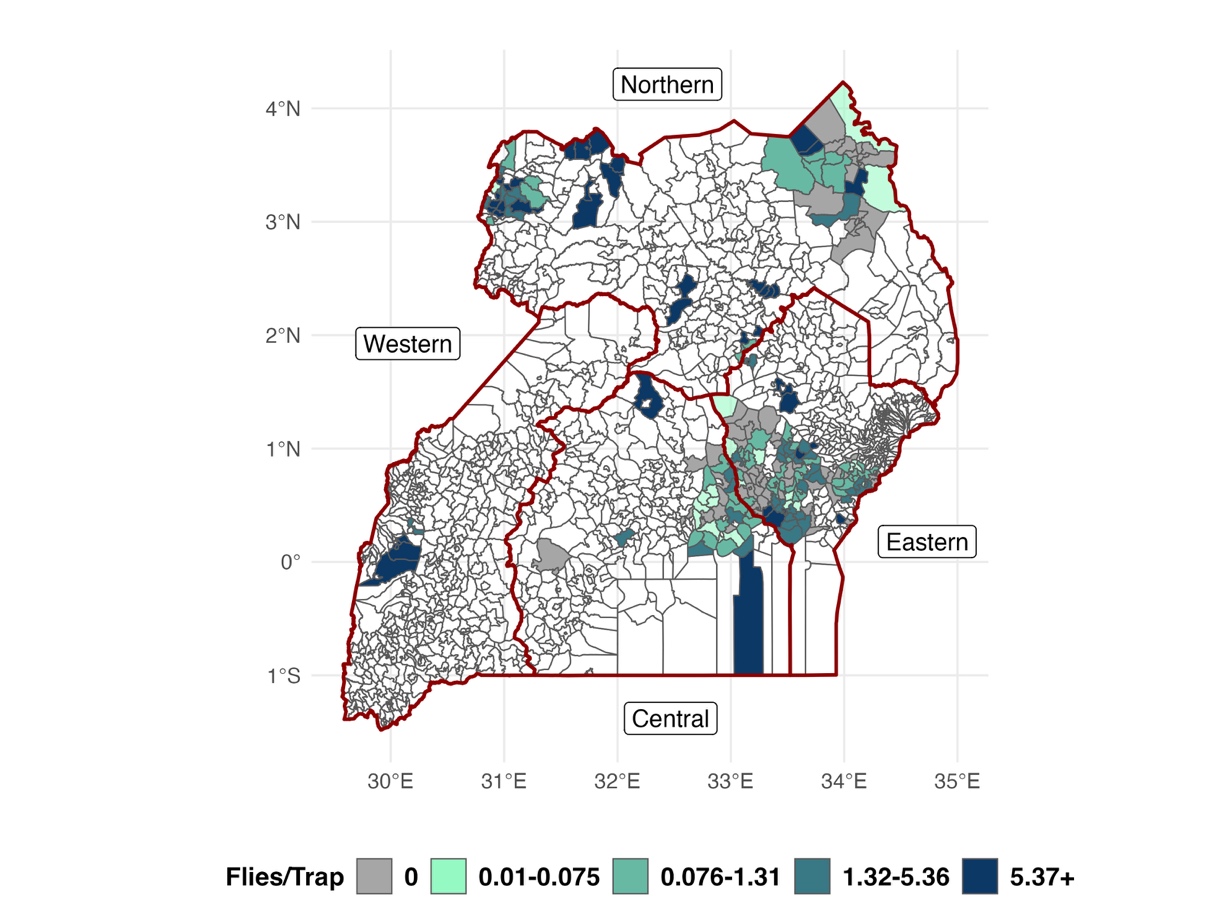


**Supplementary Figure S8.** Zero-Inflated model estimates by sub-county all Glossina species; uses quartile breaks for class definitions. Regions are denoted by thick, red borders.


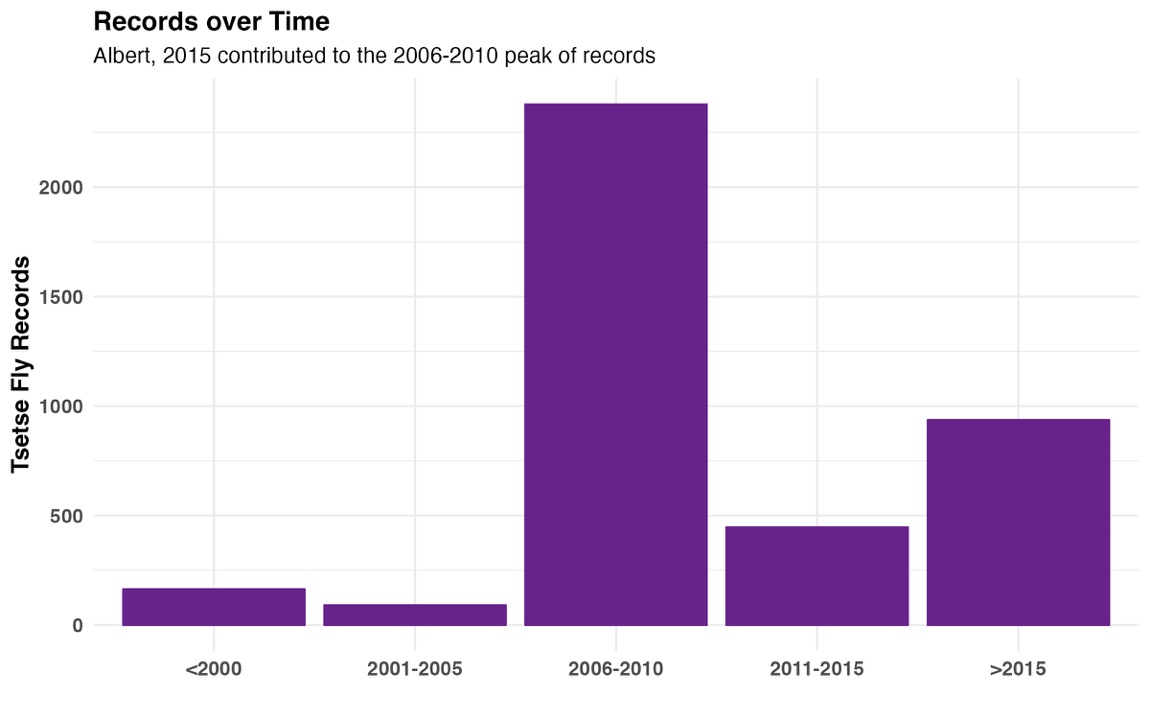


**Supplementary Figure S9.** Tsetse fly capture records over time (k = 42 publications)


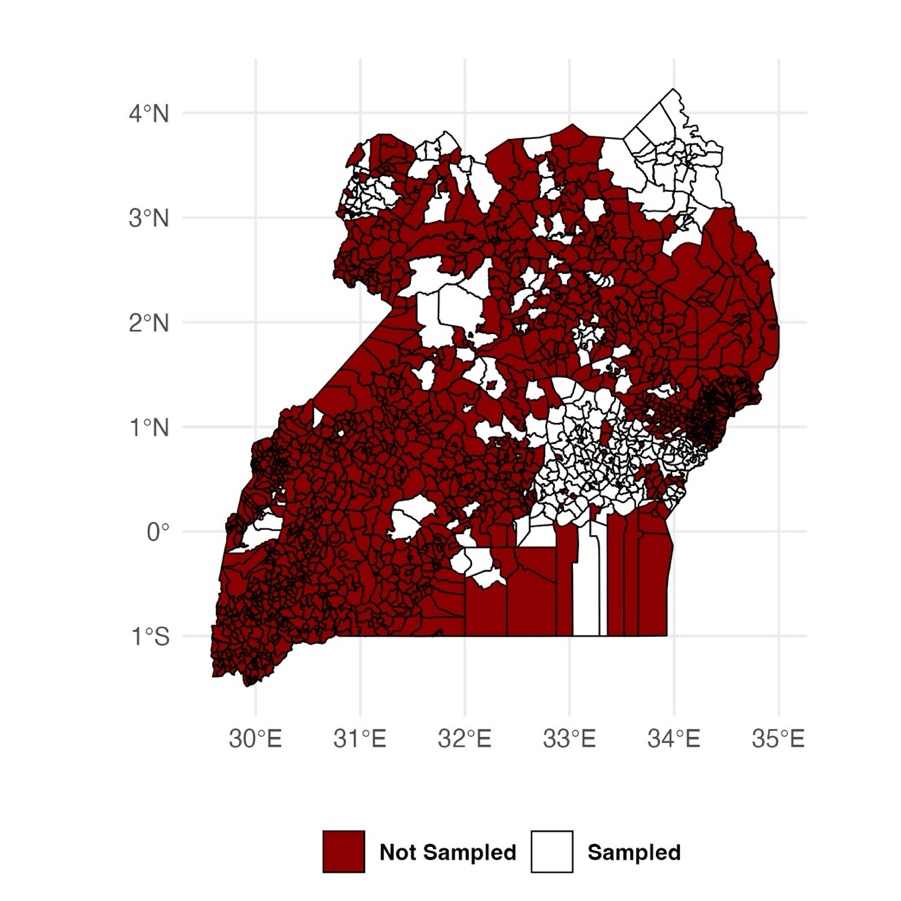


**Supplementary Figure S10.** Sub-county areas not sampled (k = 42 publications)
